# Supplementary material
Source: PubMed Central journal article supplement (PMC6486671)
Supplement: Supp_Fig7.pdf [file Supp_Fig7.pdf]

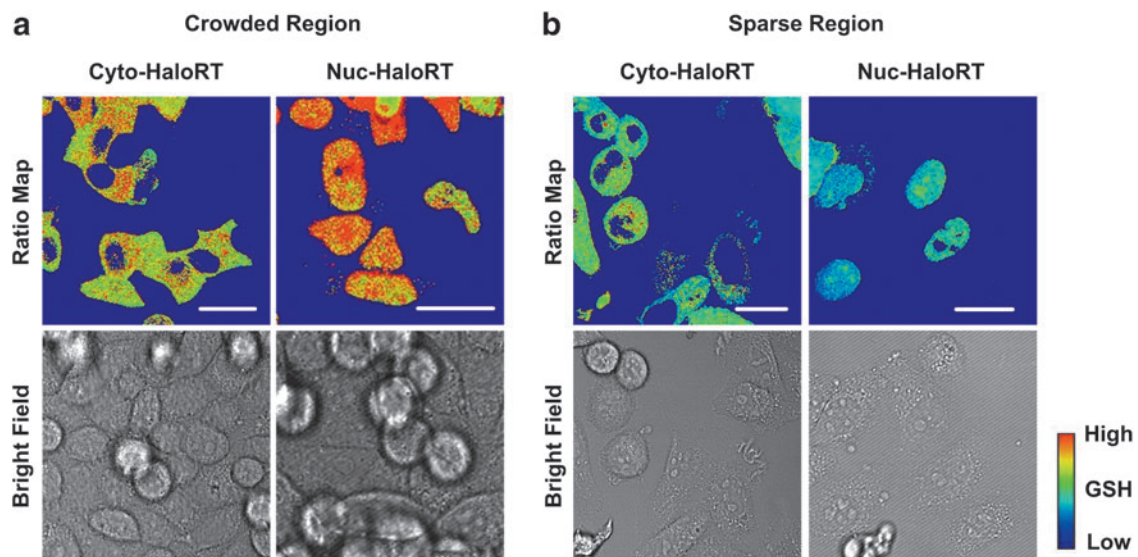

**SUPPLEMENTARY FIG. S7.** Representative ratio maps and bright field images of HeLa cells cultured in **(a)** crowded and **(b)** sparse region. The cells were either expressing nuc-Halo or cyto-Halo and were stained by HaloRT ligand. Scale bars are 10  $\mu\text{m}$ .
