# Supplementary material
Source: PubMed Central journal article supplement (PMC6486671)
Supplement: Supp_Fig8.pdf [file Supp_Fig8.pdf]

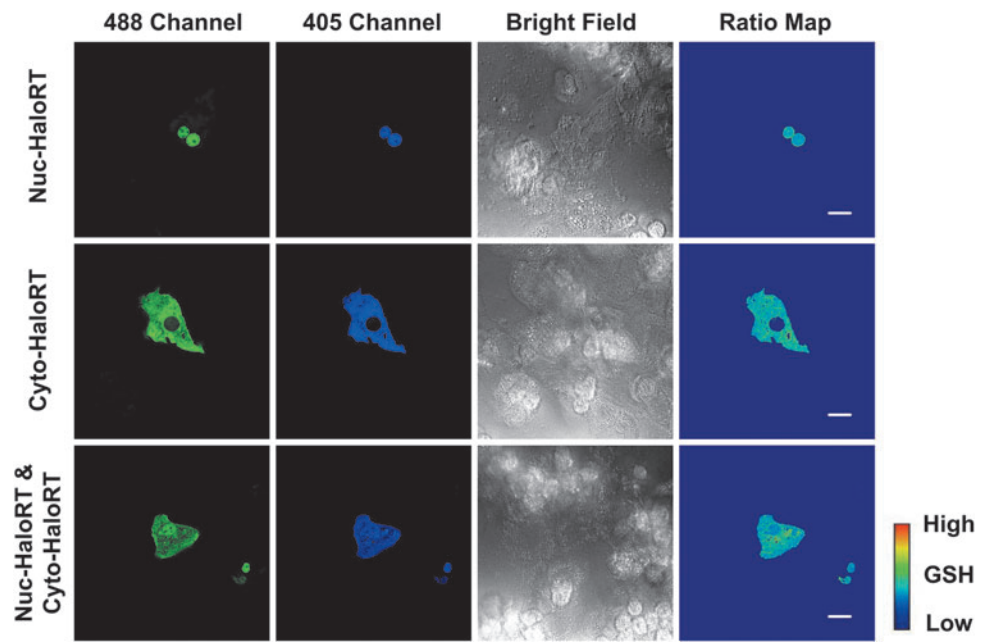

**SUPPLEMENTARY FIG. S8.** Representative confocal images and ratio maps of primary hepatocytes. The cells were expressing nuc-Halo, cyto-Halo, or both nuc-Halo and cyto-Halo and were stained by HaloRT ligand. Scale bars are 10  $\mu\text{m}$ .
