# Supplementary material
Source: PubMed Central journal article supplement (PMC6486671)

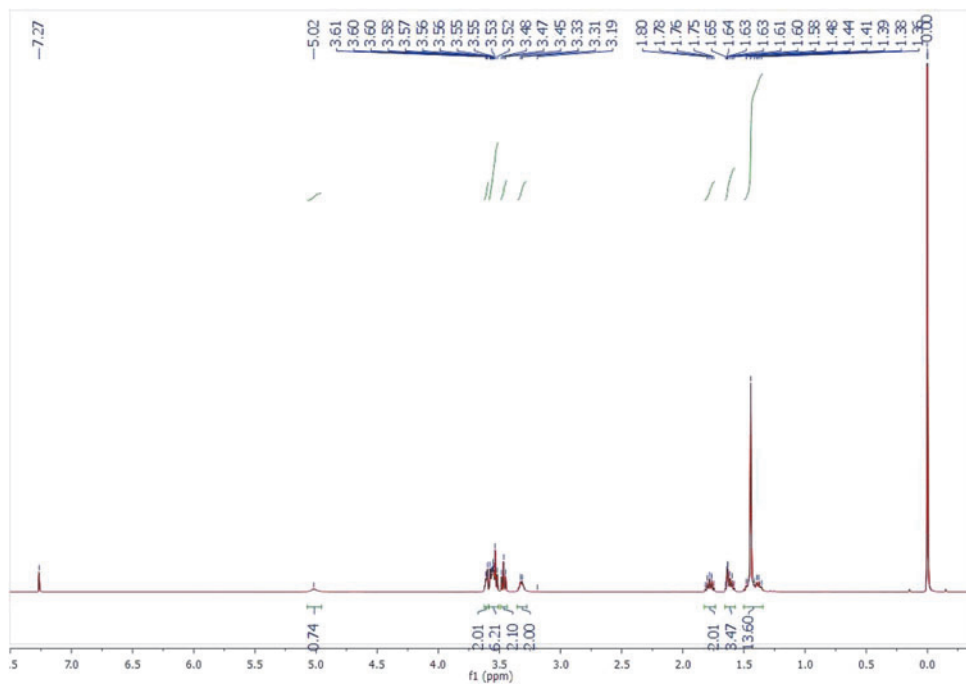

SUPPLEMENTARY FIG. S9.  $^1\text{H-NMR}$  of compound 1.

Supplement: Supp_Fig9.pdf [file Supp_Fig9.pdf]
